# Supplementary material
Source: HighWire-hosted journal article supplement (http://ajnr-stage2.highwire.org/highwire/filestream/914/field_highwire_adjunct_files/0/14-00295.pdf)
Supplement: 14-00295.pdf [file 14-00295.pdf]

## ON-LINE APPENDIX:

### **Key Data Collected in the IntrePED Study**

- Demographics
- Modified Rankin Scale
- Aneurysm treatment and rupture history
- Aneurysm symptoms
- Physical examination findings
- Resolution of any physical examination findings
- Medical history
- Medications
- Aneurysm characteristics
  - 1) Number of aneurysms
  - 2) Type
  - 3) Side location
  - 4) Status
  - 5) Size
- Procedural details

- 1) Interventionalist
  - 2) Procedure time
- Pipeline embolization details
    - 1) Number used
    - 2) Model used
    - 3) Whether the aneurysm neck was covered
    - 4) Whether any side branches were covered
  - Ancillary devices used in the procedure
  - Adverse events of interest
    - 1) Event
    - 2) Onset date
    - 3) Severity
    - 4) Relatedness
    - 5) Outcome
